# Supplementary material for: WSe2 and W(SexS1−x)2 nanoflakes grown on carbon nanofibers for the electrocatalytic hydrogen evolution reaction
Source: Royal Society of Chemistry journal article supplement (doi:10.1039/c5ta04426j), 2015-01-01
Supplement: c5ta04426j1.pdf [file c5ta04426j1.pdf]

## WSe<sub>2</sub> and W(Se<sub>x</sub>S<sub>1-x</sub>)<sub>2</sub> nanoflakes grown on carbon nanofibers for electrocatalytic hydrogen evolution reaction

MeiLing Zou, JiaDong Chen, LongFei Xiao, Han Zhu, TingTing Yang, Ming Zhang,  
MingLiang Du\*

Key Laboratory of Advanced Textile Materials and Manufacturing Technology of the  
Ministry of Education, College of Materials and Textiles, Zhejiang Sci-Tech  
University, 310018, P. R. China

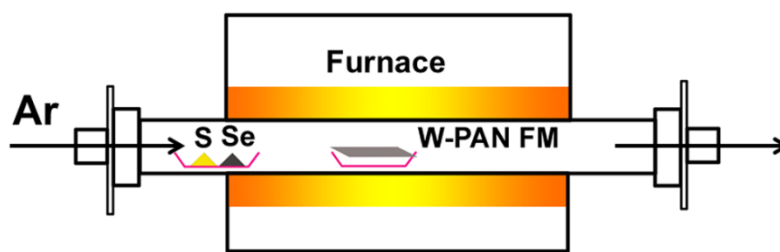

Figure S1. Schematic for the set-up used for the growth of W(Se<sub>x</sub>S<sub>1-x</sub>)<sub>2</sub> nanoflakes on CFM.

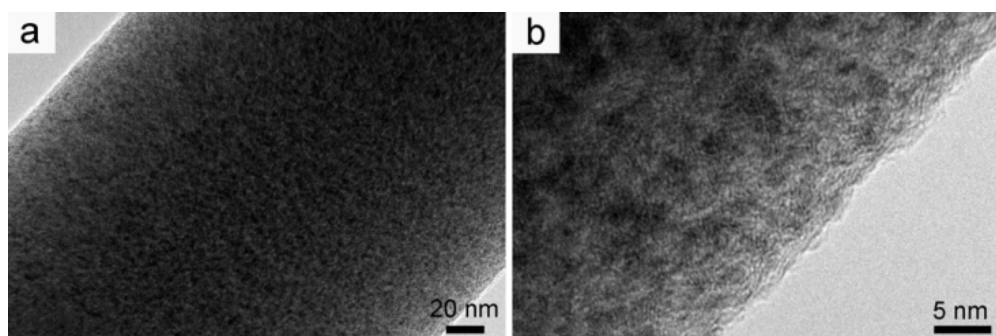

Figure S2. TEM images of WO<sub>3</sub>-C-10.

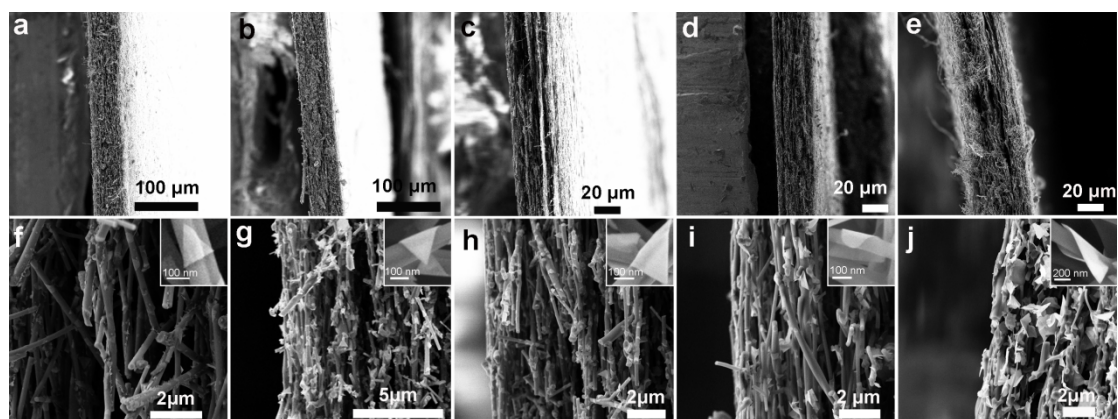

Figure S3. Cross-sectional SEM images of (a and f)  $\text{WSe}_2\text{-C-10}$ , (b and g)  $\text{WSe}_2\text{-C-20}$ , (c and h)  $\text{WSe}_2\text{-C-30}$ , (d and i) and (e and j)  $\text{W}(\text{Se}_{0.2}\text{S}_{0.8})_2\text{-C-20}$ . The insets in the figure f-j are magnified images of representative triangular nanoflakes.

Table S1. The x value of the  $\text{W}(\text{Se}_x\text{S}_{1-x})_2\text{-C-y}$  determined by different methods.

|                                                         | x value calculated from EDS | x value obtained from XPS |
|---------------------------------------------------------|-----------------------------|---------------------------|
| $\text{W}(\text{Se}_{0.4}\text{S}_{0.6})_2\text{-C-10}$ | 0.41                        | 0.38                      |
| $\text{W}(\text{Se}_{0.2}\text{S}_{0.8})_2\text{-C-20}$ | 0.22                        | 0.26                      |

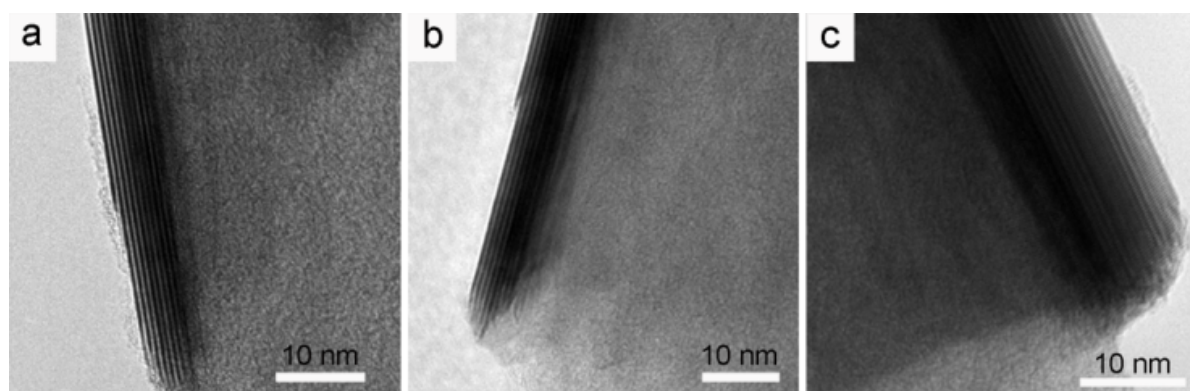

Figure S4. TEM images of (a)  $\text{WSe}_2\text{-C-10}$ , (b)  $\text{WSe}_2\text{-C-20}$ , (c)  $\text{WSe}_2\text{-C-30}$  to detect the thickness of the  $\text{WSe}_2$  nanoflakes.

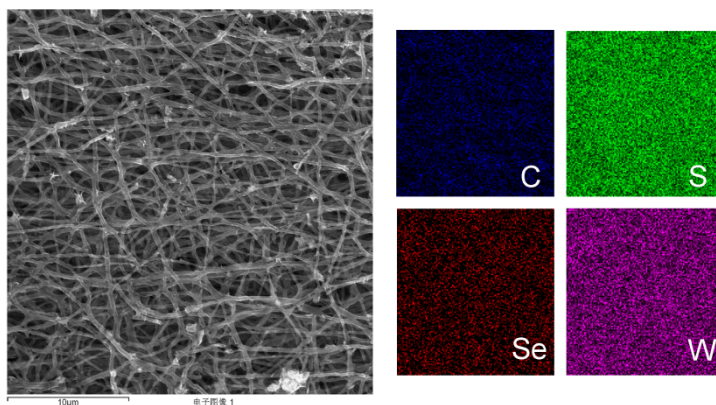

Figure S5. Element maps of  $W(Se_{0.4}S_{0.6})_2-C-10$  taken from SEM analysis.

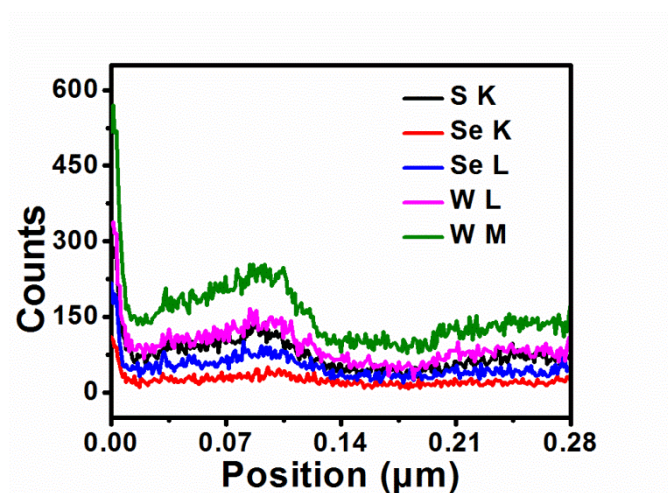

Figure S6. EELS spectra of the selected region in figure 2e.

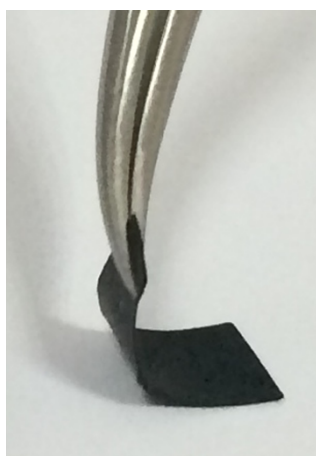

Figure S7. Digital photograph of the catalyst mat.

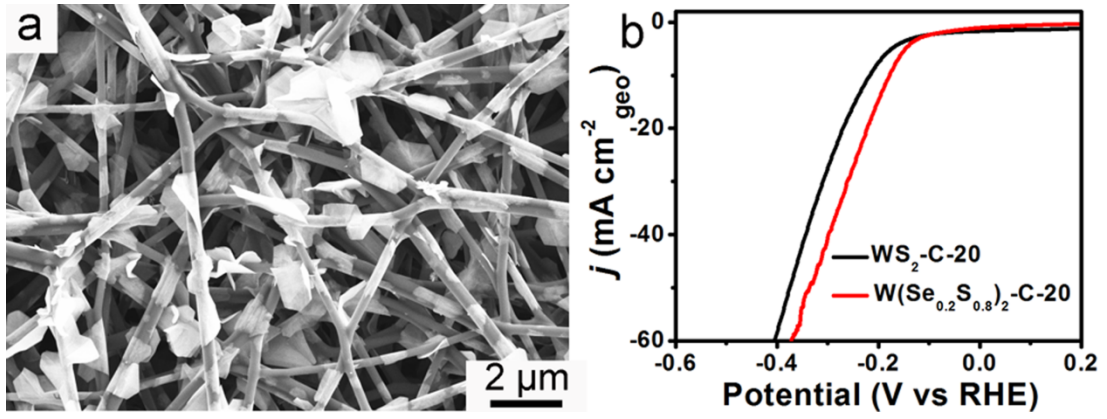

Figure S8. (a) SEM image of  $\text{WS}_2\text{-C-20}$  and (b) the polarization curves of  $\text{WS}_2\text{-C-20}$  and  $\text{W}(\text{Se}_{0.2}\text{S}_{0.8})_2\text{-C-20}$

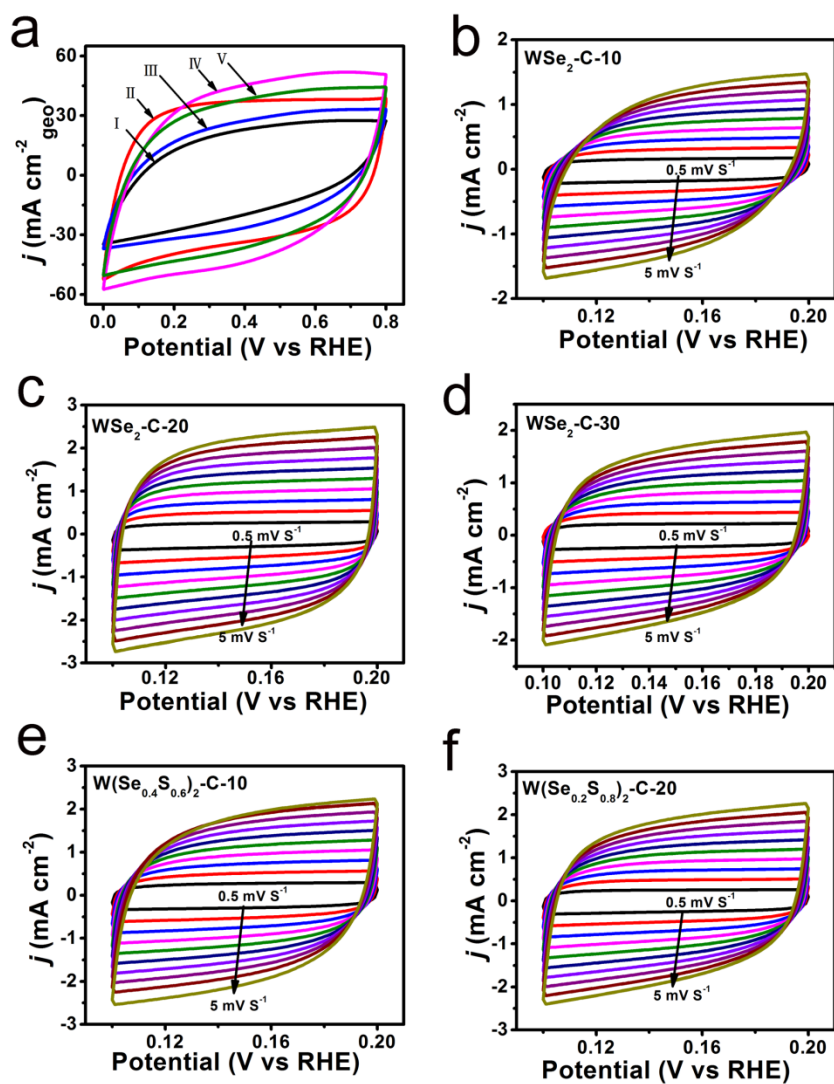

Figure S9. (a) CV plots of the catalytic electrodes at  $100 \text{ mV s}^{-1}$  after 400 cycles in  $0.5 \text{ M H}_2\text{SO}_4$ : ( I )  $\text{WSe}_2\text{-C-10}$ , ( II )  $\text{Se}_2\text{-C-20}$ , ( III )  $\text{WSe}_2\text{-C-30}$ , ( IV )  $\text{W}(\text{Se}_{0.4}\text{S}_{0.6})_2\text{-C-10}$  and ( V )  $\text{W}(\text{Se}_{0.1}\text{S}_{0.9})_2\text{-C-20}$ . CV curves (b)  $\text{WSe}_2\text{-C-10}$ , (c)  $\text{WSe}_2\text{-C-20}$ , (d)  $\text{WSe}_2\text{-C-30}$ , (e)  $\text{W}(\text{Se}_{0.4}\text{S}_{0.6})_2\text{-C-10}$  and (f)  $\text{W}(\text{Se}_{0.2}\text{S}_{0.8})_2\text{-C-20}$  electrode at various scan rates ( $0.5\text{-}5 \text{ mV s}^{-1}$ ).

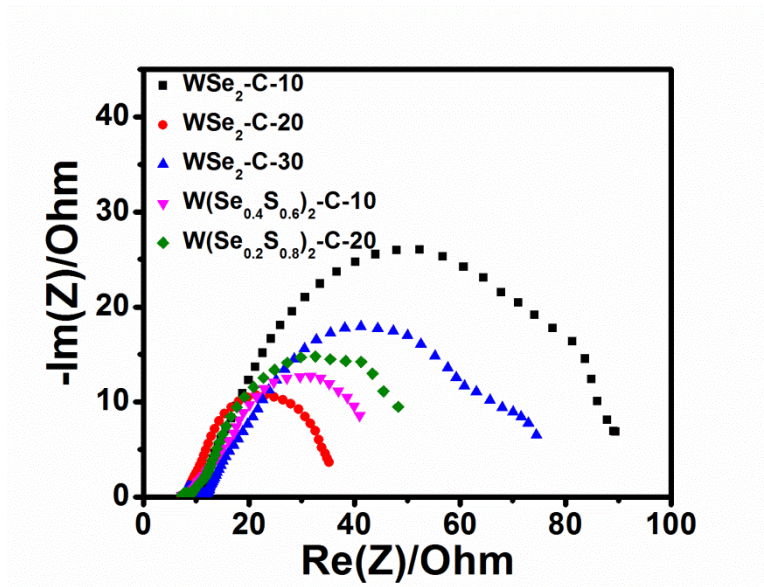

Figure S10. Impedance spectra of the indicated electrodes at  $\eta = 150$  mV.

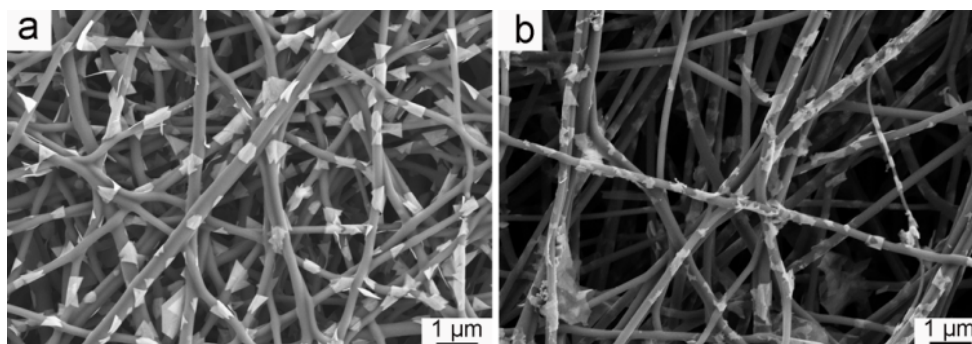

Figure S11. Representative SEM images of (a)  $\text{WSe}_2\text{-C-20}$  and (b)  $\text{W}(\text{Se}_{0.4}\text{S}_{0.6})_2\text{-C-10}$  after chronoamperometric response test for 12h.

Table S2. Summary of some state-of-the-art HER electrocatalysts.

| Material                                              | Morphology      | Conductions<br>[electrolyte, loading]                             | $\eta_{10}$ [mV] | Tafel slope<br>[mV dec <sup>-1</sup> ] | Exchange current<br>density [mA cm <sup>-2</sup> ] | ref             |
|-------------------------------------------------------|-----------------|-------------------------------------------------------------------|------------------|----------------------------------------|----------------------------------------------------|-----------------|
| WS <sub>2(1-x)</sub> Se <sub>2x</sub>                 | monolayer       | 0.5M H <sub>2</sub> SO <sub>4</sub><br>N/A                        | 150              | 85                                     | N/A                                                | 42              |
| MoS <sub>1.0</sub> Se <sub>1.0</sub>                  | few layer       | 0.5M H <sub>2</sub> SO <sub>4</sub><br>0.18 mg cm <sup>-2</sup>   | 200              | 56±3                                   | 0.32                                               | 33              |
| MoSSe                                                 | nanoflakes      | 0.5M H <sub>2</sub> SO <sub>4</sub><br>0.28 mg cm <sup>-2</sup>   | 164±2            | 48±3                                   | N/A                                                | 32              |
| MoS <sub>4/3</sub> Se <sub>2/3</sub>                  | nanoflakes      | 0.5M H <sub>2</sub> SO <sub>4</sub><br>0.28 mg cm <sup>-2</sup>   | 172±1            | 66±1                                   | N/A                                                | 32              |
| MoS <sub>2/3</sub> Se <sub>4/3</sub>                  | nanoflakes      | 0.5M H <sub>2</sub> SO <sub>4</sub><br>0.28 mg cm <sup>-2</sup>   | 171±2            | 55±1                                   | N/A                                                | 32              |
| WSe <sub>2</sub>                                      | dendritic       | 0.5M H <sub>2</sub> SO <sub>4</sub><br>2.2 mg cm <sup>-2</sup>    | 228              | 80                                     | 0.015                                              | 28              |
| W(S <sub>0.48</sub> Se <sub>0.52</sub> ) <sub>2</sub> | nanotube        | 1M H <sub>2</sub> SO <sub>4</sub><br>N/A                          | 260              | 105                                    | 0.029                                              | 27              |
| WSe <sub>2</sub>                                      | vertical sheets | 0.5 H <sub>2</sub> SO <sub>4</sub><br>N/A                         | 300              | 77.4                                   | N/A                                                | 26              |
| MoSe <sub>2</sub>                                     | vertical sheets | 0.5 H <sub>2</sub> SO <sub>4</sub><br>N/A                         | 250              | 59.8                                   | 0.00038                                            | 26              |
| WS <sub>2</sub>                                       | exfoliated 1T   | 0.5 H <sub>2</sub> SO <sub>4</sub><br>0.1-0.2 μg cm <sup>-2</sup> | 210              | 55                                     | 0.02                                               | 43              |
| W(Se <sub>0.4</sub> S <sub>0.6</sub> ) <sub>2</sub>   | triangular      | 0.5 H <sub>2</sub> SO <sub>4</sub><br>N/A                         | 174              | 106                                    | 0.229                                              | present<br>work |
| WSe <sub>2</sub>                                      | triangular      | 0.5 H <sub>2</sub> SO <sub>4</sub>                                | 98               | 158                                    | 0.24                                               | present<br>work |
